# Supplementary material for: Loss of tumor suppressor TMEM127 drives RET-mediated transformation through disrupted membrane dynamics
Source: eLife journal article supplement (doi:10.7554/elife.89100), 2023-09-19
Supplement: fig2-figsupp1-data1 [file Figure 2 Supplement 1-Source Data 1.xlsx]

## Sheet: Fig 2 Supp 1A
	Mock-KO	TMEM127-KO
	16	21
	19	13
	18	18
	15	9
	20	19
	19	18
	18	12
	19	14
	14	15
	20	12
	16	14
	18	15
	24	15
	21	13
	18	10
	15	16
	14	13
	22	11
	12	19
	13	17
	9	20
	18	16
	24	17
	14	18
	12	15
	16	17
	18	12
	14	13
	16	13
	18	13
	17	12
	12	13
		13
		12
		11
		15
		15
		18
		12
		19
		11
		14
		11

## Sheet: Fig 2 Supp 1B
	Mock-KO	TMEM127-KO
	100	62.32
	100	56.65
	100	64.04

## Sheet: Fig 2 Supp 1C
	Mock-KO	TMEM127-KO
	-	-	16h	40h
	1	1.44248	1.24623
	1	1.45588	1.24876	1.09244

## Sheet: Fig 2 Supp 1D
	Protein	HEK293 Mock-KO		HEK293 TMEM127-KO		HEK293 TMEM127-KO +Flag-TMEM127
	CDH2	1	1	1.66	1.55	0.25	0.58
	TfR1	1	1	1.37	1.5	0.38	0.58
