# Supplementary material for: Loss of tumor suppressor TMEM127 drives RET-mediated transformation through disrupted membrane dynamics
Source: eLife journal article supplement (doi:10.7554/elife.89100), 2023-09-19
Supplement: fig2-figsupp2-data1 [file Figure 2 Supplement 2-Source Data 1.xlsx]

## Sheet: Fig 2 Supp 2
	Mock-KO	TMEM127-KO
	1	0.43
