# Supplementary material for: Loss of tumor suppressor TMEM127 drives RET-mediated transformation through disrupted membrane dynamics
Source: eLife journal article supplement (doi:10.7554/elife.89100), 2023-09-19
Supplement: fig3-data1 [file Figure 3-Source Data1.xlsx]

## Sheet: Figure 3B
	Mock-KO		TMEM127-KO
	-GDNF	+GDNF	-GDNF	+GDNF
	141.024	169.46	125.814	137.101
	139.395	167.867	123.873	136.938
	139.188	165.618	123.634	135.473
	138.915	160.746	122.868	132.841
	137.642	157.045	122.791	132.166
	134.093	150.353	122.398	130.816
	134.056	148.303	121.123	127.546
	134.038	146.899	120.055	123.043
	130.584	146.384	117.73	122.787
	129.334	145.385	115.087	122.657
	129.236	143.888	114.841	120.192
	127.792	141.142	114.792	120.143
	127.534	139.978	114.38	119.888
	127.489	138.892	113.526	119.622
	125.969	138.804	113.353	117.872
	124.595	136.024	113.078	115.344
	120.849	135.295	112.139	113.277
	118.011	130.976	111.199	113.242
	117.686	130.849	109.405	112.598
	115.553	126.916	107.553	111.35
	115.129	125.14	106.996	108.289
	114.901	125.095	106.601	105.571
	113.613	117.844	105.241	103.175
	113.604	117.414	103.356	98.4584
	109.892	117.058	102.38	95.8944
	109.4	113.344	101.864	95.886
	108.35	112.569	101.261	93.1015
	106.284	111.133	101.246	91.1603
	105.186	110.917	100.529	91.047
	103.297	110.626	100.138	90.9768

## Sheet: Figure 3C
	Mock-KO		TMEM127-KO
	-GDNF	+GDNF	-GDNF	+GDNF
	1.57808	1.71838	1.03399	1.11075
	1.57162	1.68544	1.03097	1.07506
	1.56232	1.67408	1.01727	1.05903
	1.54083	1.63168	1.00765	1.03449
	1.48969	1.62828	0.992954	1.03174
	1.43571	1.58237	0.985493	1.02678
	1.41873	1.50746	0.972437	1.01713
	1.40886	1.50024	0.966613	0.978123
	1.3695	1.49835	0.932671	0.97231
	1.36205	1.46918	0.927636	0.969463
	1.35278	1.4609	0.881636	0.964932
	1.29574	1.45038	0.861442	0.927622
	1.28723	1.42576	0.846638	0.912062
	1.27163	1.35631	0.832533	0.880873
	1.25362	1.30905	0.826036	0.840058
	1.25101	1.30891	0.804398	0.821768
	1.24289	1.28496	0.802171	0.794878
	1.22896	1.24725	0.797062	0.788922
	1.19376	1.22471	0.794082	0.776403
	1.16605	1.20769	0.793511	0.773092
	1.13681	1.14157	0.765847	0.762431
	0.992873	1.1219	0.764106	0.750138
	0.955278	1.10786	0.746319	0.749805
	0.945665	1.09877	0.736583	0.745417
	0.927837	1.06363	0.707552	0.740082
	0.909173	1.04503	0.694246	0.737379
	0.90695	1.03987	0.6902	0.726066
	0.885386	1.03479	0.659087	0.721781
	0.88162	0.997978	0.653022	0.709741
	0.821868	0.949301	0.640639	0.706839
	0.819696	0.930833	0.632854	0.700582
	0.814228	0.930028	0.591093	0.680648
	0.803643	0.916971	0.588175	0.678813
	0.798842	0.898573	0.586509	0.670686
	0.769958	0.884877	0.564856	0.663336
	0.738884	0.880776	0.556785	0.64526
	0.727828	0.860118	0.536807	0.630021
	0.722065	0.839206	0.516422	0.624752
	0.711819	0.80913	0.515185	0.620614
	0.710194	0.798465	0.509165	0.614946
	0.694274	0.773408	0.503471	0.60195
	0.669586	0.763566	0.496255	0.587435
	0.649266	0.748091	0.463263	0.585376
	0.567418	0.740967	0.460088	0.582115
	0.565763	0.72245	0.45417	0.576495
	0.55956	0.715601	0.441765	0.559375
	0.526408	0.697963	0.430075	0.551693
	0.518954	0.684453	0.42715	0.542507
	0.496413	0.665606	0.417537	0.537937
	0.490669	0.654111	0.395387	0.534385

## Sheet: Figure 3D
	Mock-KO	TMEM127-KO
	1293.65	574.798
	1454.89	653.932
	1426.32	614.588
	1332.11	635.437
	1203.91	634.418
	948.805	617.618
	1137.21	645.958
	1047.86	622.46
	1096.63	646.671
	1498.74	642.108
	1429.4	651.348
	1344.74	623.539
	1033.85	627.362
	1036.21	601.389
	565.177	608.785
	562.6	615.035
	565.217	612.467
	566.762	613.556
	557.178	665.742
	1180.75	682.103
	960.269	695.913
	938.829	685.65
	1024.52	701.938
	1528.02	690.82
	554.195	679.278
	1330.2	679.001
	1092.71	648.535
	1015.07	652.954
	594.539	653.119
	582.91	695.214
	591.737	662.938
	584.606	640.065
	571.701	635.211
	574.529	614.926
		614.875
		615.272
		614.695
		615.838
		613.944
		614.103
		616.342
		570.19
		570.856
		571.546
		574.005
		578.561
		574.021
		574.627
		568.523
		548.393
		548.466
		549.556

## Sheet: Figure 3F
	Mock-KO	TMEM127-KO
	0.0163818	0.008086
	0.013183	0.007945
	0.01422	0.009868
	0.012359	0.00799
	0.01575	0.008142
	0.015144	0.008535
	0.016478	0.007856
	0.018	0.010281
	0.016752	0.011043
	0.017815	0.010712
	0.014427	0.010459
	0.014405	0.008896
	0.015633	0.007848
	0.015529	0.006871
	0.019877	0.007637
	0.016427	0.007943
	0.017702	0.008506
	0.016579	0.008435
	0.016109	0.008486
	0.021618	0.012673
	0.01898	0.008244
	0.017189	0.01047
	0.017821	0.009583
	0.019806	0.008857
	0.013819	0.007833
	0.015488	0.008728
		0.010071
		0.010198
		0.007828
		0.007112
		0.00871
		0.009736
		0.008208
		0.008435
		0.007939
		0.00991
		0.005704
		0.005501
		0.005998
		0.00648
		0.005322
		0.006926
		0.007605
		0.009746
		0.006394
		0.007497
		0.006731
		0.008657
		0.007402
		0.009556
		0.009276
		0.009293
		0.00719
		0.007804
		0.007514

## Sheet: Figure 3G
	Mock-KO	TMEM127-KO
	143	116
	275	200
	180	212
	386	103
	209	148
	228	101
	313	90
	400	121
	203	93
	307	111
	351	111
	309	250
	215	125
	199	249
	435	215
	195	315
	443	174
	372	108
	126	214
	174	55
	330	201
	197	168
	349	242
	268	251
	345	48
	288	180
		212
		111
		273
		125
		162
		371
		192
		108
		212
		245
		416
		409
		404
		152
		466
		162
		400
		114
		340
		183
		108
		350
		353
		239
		380
		239
		326
		179
		292
