# Supplementary material for: Loss of tumor suppressor TMEM127 drives RET-mediated transformation through disrupted membrane dynamics
Source: eLife journal article supplement (doi:10.7554/elife.89100), 2023-09-19
Supplement: fig5-data1 [file Figure 5-Source Data1.xlsx]

## Sheet: Figure 5C
	Mock-KO	TMEM127-KO
	0.05537	0.12387
	0.05971	0.05725
	0.05101	0.08819
	0.04698	0.10996
	0.05887	0.08812
	0.07857	0.13746
	0.04462	0.12418
	0.09723	0.13043
	0.05664	0.11623
	0.07942	0.08998
	0.04572	0.08443
	0.05651	0.11176
	0.0397	0.05875
	0.11173	0.1686
	0.11683	0.24066
	0.05285	0.09931
	0.06931	0.12198
	0.09253	0.13653
	0.09006	0.11929
	0.15006	0.08742
		0.1129
		0.12313
		0.11284
		0.18264
		0.18436
		0.18097
		0.16623
		0.13888

## Sheet: Figure 5D
	Mock-KO	TMEM127-KO
	0.20031	0.17589
	0.2224	0.10077
	0.13869	0.13285
	0.1365	0.1295
	0.23313	0.15106
	0.19571	0.17522
	0.11126	0.18377
	0.1926	0.17171
	0.14915	0.15666
	0.29185	0.15169
	0.22861	0.16622
	0.15393	0.1556
	0.16306	0.07993
	0.29493	0.17097
	0.43037	0.22424
	0.27507	0.13145
	0.26578	0.16667
	0.38471	0.20515
	0.24431	0.16283
	0.43643	0.16068
		0.20698
		0.25013
		0.21221
		0.21381
		0.23312
		0.21058
		0.24034
		0.29272

## Sheet: Figure 5E
	Mock-KO	TMEM127-KO
	0.61839	0.68902
	0.77962	0.41734
	0.67637	0.41395
	0.61956	0.37947
	0.72768	0.3312
	0.73167	0.42652
	0.7125	0.55658
	0.61929	0.60401
	0.5637	0.5738
	0.58088	0.59191
	0.60747	0.77864
	0.70395	0.39581
	0.68704	0.49198
	0.72294	0.50147
	0.71675	0.54254
	0.73321	0.40517
	0.70058	0.53078
	0.69035	0.49561
	0.55627	0.25787
	0.81823	0.3681
		0.59362
		0.55575
		0.49178
		0.62181
		0.40882
		0.37388
		0.61097
		0.42349

## Sheet: Figure 5F
		Immobile				Confined				Mobile
	Mock-KO	0.0372	0.0678	0.0559	0.0744	0.0897	0.1197	0.099	0.1094	0.8731	0.8126	0.845	0.8162
	TMEM127-KO	0.0316	0.0564	0.0614	0.0671	0.084	0.0967	0.0896	0.1048	0.8844	0.8469	0.849	0.8281

## Sheet: Figure 5G
		Mock-KO				TMEM127-KO
	Immobile	0.17226	0.1483	0.18444	0.14592	0.2025	0.18964	0.18202	0.16476
	Confined	0.4628	0.36658	0.4625	0.35474	0.55662	0.42778	0.49424	0.41804
	Mobile	0.81402	0.6955	0.8231	0.69052	1.01934	0.86274	0.95774	0.85676
