# Supplementary material for: Loss of tumor suppressor TMEM127 drives RET-mediated transformation through disrupted membrane dynamics
Source: eLife journal article supplement (doi:10.7554/elife.89100), 2023-09-19
Supplement: fig7-data1 [file Figure 7-Source Data 1.xlsx]

## Sheet: Figure 7B
	Time (h)	Mock-KO			TMEM127-KO
	0	100	100	100	100	100	100
	1	55.464	60.634	54.417	82.017	82.619	65.551
	2	37.03	36.667	34.584	77.07	66.118	61.796
	4	21.134	23.171	17.769	57.126	52.752	58.555
	6	11.606	18.142	16.781	46.717	51.246	52.746
	8	8.786	11.227	15.407	45.738	47.531	49.254
	10	7.551	10.876	12.207	45.425	45.414	47.196
	12	5.858	9.102	10.617	40.598	42.325	44.823
