# Supplementary material for: Loss of tumor suppressor TMEM127 drives RET-mediated transformation through disrupted membrane dynamics
Source: eLife journal article supplement (doi:10.7554/elife.89100), 2023-09-19
Supplement: fig8-data1 [file Figure 8-Source Data 1.xlsx]

## Sheet: Figure 8B
			pRET			pAKT			pERK			pS6
	Mock-KO	0	1	1	1	1	1	1	1	1	1	1	1	1
		5	9.57	11.44	10.93	11.72	10.37	11.54	4.27	4.52	8.69	1.59	2.22	2.99
		15	15.37	15.29	15.39	29.38	19.12	17.28	5.01	6.12	14.76	17.65	9.93	22.76
		30	16.43	19.56	17.63	23.47	19.95	17.42	5.09	6.54	15.31	88.41	66.67	120.48
	TMEM127-KO	0	1.69	1.55	1.13	20.54	13.13	8.35	3.6	4.42	5.87	47.99	34.26	80.42
		5	8.23	9.08	4.04	27.75	19.03	10.95	3.82	6.93	11.85	64.07	65.35	119.21
		15	9.17	8.25	4.57	34.3	22.42	14.29	4.38	8.05	11.6	99.49	99.04	123.32
		30	8.07	9.56	4.19	44.41	30.53	12.59	4.54	8.31	10.59	111.51	125.17	169.35

## Sheet: Figure 8D
	Day	Mock-KO (-GDNF)
	0	1.097	0.959	1.083	0.915	0.954	0.896	0.954	1.035	1.107	1.049	0.968	0.968	1.073	1.059	0.997	0.968	0.925	0.992	0.832	0.885	1.029	0.938	0.938	0.871	0.914	1.203	1.025	1.15	0.938	1.029	0.904	1.025	1.116	1.005	1.222	0.976	0.867	1.043	1.261	1.033	1.048	1.069	0.737	0.898	1.059	1.028	0.903	0.955
	1	1.226	1.212	1.212	1.202	1.293	1.188	1.322	1.25	1.265	1.298	1.255	1.226	1.265	1.274	1.336	1.317	1.313	1.226	1.515	1.429	1.39	1.371	1.352	1.376	1.414	1.371	1.515	1.275	1.212	1.443	1.419	1.448	1.371	1.279	1.361	1.193	1.5	1.489	1.64	1.547	1.572	1.355	1.593	1.469	1.381	1.334	1.391	1.163
	2	1.408	1.509	1.365	1.446	1.418	1.533	1.475	1.408	1.475	1.446	1.356	1.499	1.547	1.336	1.379	1.442	1.427	1.504	1.842	1.424	1.515	1.501	1.515	1.616	1.496	1.395	1.313	1.467	1.366	1.65	1.4	1.53	1.337	1.429	1.289	1.477	1.391	1.313	1.365	1.438	1.547	1.417	1.313	1.37	1.355	1.489	1.604	1.464
	3	1.427	1.552	1.384	1.394	1.446	1.49	1.394	1.442	1.394	1.418	1.595	1.442	1.48	1.446	1.461	1.614	1.379	1.437	1.549	1.573	1.424	1.549	1.568	1.385	1.51	1.679	1.602	1.587	1.64	1.481	1.65	1.799	1.241	1.606	1.414	1.318	1.536	1.619	1.422	1.515	1.505	1.609	1.484	1.687	1.412	1.624	1.666	1.386
	Day	Mock-KO (+GDNF)
	0	1.097	0.959	1.083	0.915	0.954	0.896	0.954	1.035	1.107	1.049	0.968	0.968	1.073	1.059	0.997	0.968	0.925	0.992	0.832	0.885	1.029	0.938	0.938	0.871	0.914	1.203	1.025	1.15	0.938	1.029	0.904	1.025	1.116	1.005	1.222	0.976	0.867	1.043	1.261	1.033	1.048	1.069	0.737	0.898	1.059	1.028	0.903	0.955
	1	1.523	1.719	1.528	1.805	1.647	1.638	1.48	1.743	1.576	1.69	1.48	1.681	1.523	1.643	1.666	1.528	1.528	1.547	1.76	1.756	1.674	1.712	1.746	1.549	1.765	1.847	1.693	1.707	1.549	1.573	1.683	1.669	1.972	1.563	1.76	1.717	1.744	1.614	1.764	1.832	1.676	1.697	1.873	1.65	1.827	1.905	1.837	2.143
	2	1.882	1.719	1.705	1.843	1.887	1.829	1.7	1.671	1.633	1.767	1.853	1.724	1.748	1.772	1.657	1.585	1.614	1.733	1.89	2.544	1.765	2.006	1.938	1.871	1.905	2.342	0.726	1.953	1.828	2.107	1.775	2.126	1.808	2.063	1.78	2.487	1.873	2.112	1.967	1.993	1.982	2.351	1.889	2.221	2.174	2.148	1.884	2.418
	3	2.049	2.231	2.154	2.188	2.044	1.91	1.867	2.307	2.322	2.02	2.083	1.934	2.025	2.054	2.102	2.035	1.934	1.953	2.289	2.275	1.948	2.275	2.184	2.289	2.087	2.27	1.991	2.174	2.078	1.794	2.097	2.087	2.102	2.059	1.818	1.861	1.827	1.925	2.086	1.92	1.988	1.977	1.816	1.687	2.071	1.811	1.988	2.091
	Day	TMEM127-KO (-GDNF)
	0	0.852	1.051	1.013	1.1	0.935	0.852	0.815	1.133	1.042	1.08	1.055	0.955	0.889	1.042	1.001	1.125	1.017	1.042	1.044	1.013	0.966	0.983	0.901	1.061	0.927	1.009	0.897	0.992	1.065	1.056	0.957	0.983	1.082	1.056	0.996	1.009	0.925	0.969	1.082	1.266	0.941	0.998	0.936	0.998	1.042	1.059	0.93	1.082
	1	1.15	1.278	1.262	1.196	1.295	1.527	1.225	1.378	1.307	1.448	1.552	1.457	1.138	1.191	1.341	1.49	1.457	1.37	1.801	1.767	1.75	1.737	1.887	1.633	1.84	1.651	1.758	1.719	1.741	1.814	1.659	1.823	1.788	1.711	1.651	1.857	2.381	2.264	2.152	2.308	2.224	2.028	2.236	2.096	2.073	1.967	1.967	2.051
	2	1.92	1.726	1.813	2.09	1.68	1.593	1.825	1.933	1.705	1.775	1.763	1.995	1.875	1.838	1.767	1.817	1.771	1.726	2.292	2.546	2.529	2.477	2.529	2.37	2.576	2.344	2.413	2.413	2.408	2.387	2.249	2.546	2.425	2.546	2.292	2.404	2.981	2.992	3.233	3.244	3.104	3.787	2.841	3.16	3.132	3.3	3.098	3.457
	3	2.471	2.343	3.196	2.633	2.571	3.358	2.558	2.426	2.968	2.579	2.459	3.101	2.716	2.571	3.097	2.774	3.051	3.366	3.433	3.807	3.851	3.829	3.799	3.803	3.833	3.648	3.368	3.67	3.704	3.756	3.549	3.601	3.687	3.325	3.515	3.541	4.308	4.611	5.311	4.729	4.437	5.334	4.454	4.622	4.88	4.712	4.796	4.359
	Day	TMEM127-KO (+GDNF)
	0	0.852	1.051	1.013	1.1	0.935	0.852	0.815	1.133	1.042	1.08	1.055	0.955	0.889	1.042	1.001	1.125	1.017	1.042	1.044	1.013	0.966	0.983	0.901	1.061	0.927	1.009	0.897	0.992	1.065	1.056	0.957	0.983	1.082	1.056	0.996	1.009	0.925	0.969	1.082	1.266	0.941	0.998	0.936	0.998	1.042	1.059	0.93	1.082
	1	1.332	1.535	1.357	1.394	1.419	1.432	1.452	1.498	1.415	1.394	1.386	1.415	1.212	1.307	1.303	1.295	1.39	1.274	1.849	1.853	1.844	1.758	1.853	1.582	1.625	1.857	1.754	1.784	1.793	1.668	1.745	1.788	1.569	1.625	1.728	1.758	2.404	2.168	2.224	2.336	2.056	2.331	2.331	2.213	2.23	2.23	2.191	2.241
	2	1.792	1.825	2.02	1.912	1.846	1.883	2.148	1.925	2.057	2.028	1.883	2.277	1.925	1.713	1.635	1.871	1.896	2.243	2.58	2.572	2.748	2.611	2.636	2.688	2.654	2.619	2.512	2.46	2.456	2.555	2.804	2.86	2.916	2.624	2.761	2.989	3.02	3.098	3.804	4.034	3.121	4.056	3.132	3.289	3.726	3.653	3.21	3.911
	3	2.778	2.769	2.624	2.919	2.641	2.923	2.79	2.538	2.84	2.682	2.848	2.861	2.517	2.645	2.848	2.558	3.01	2.865	4.027	3.993	3.717	3.704	3.696	3.825	4.096	3.863	3.734	3.795	3.838	4.083	3.842	4.07	3.691	3.575	3.842	3.803	4.594	4.258	4.275	4.745	4.998	4.723	4.118	4.051	3.944	4.09	4.544	4.566
[truncated: 6 more columns]

## Sheet: Figure 8E
	Day	Mock-KO GDNF
	0	1.019	1.101	1.066	0.925	0.976	1.05	0.952	1.026	0.972	1.089	0.933	0.937	1.015	1.026	0.913	0.968	1.003	1.03	0.975	0.963	1.03	1.043	0.963	1.005	0.959	1.047	1.022	0.975	1.039	1.005	1.034	1.043	0.954	0.984	1.001	0.959	0.989	1.02	1.016	0.989	0.998	0.994	0.945	0.976	1.002	0.989	0.985	1.042
	1	1.273	1.347	1.058	1.183	1.183	1.3	1.511	1.612	1.323	1.374	1.401	1.327	1.273	1.343	1.3	1.237	1.417	1.413	1.241	1.308	1.334	1.287	1.338	1.283	1.372	1.443	1.245	1.33	1.169	1.393	1.144	1.355	1.262	1.292	1.292	1.144	1.27	1.704	1.384	1.371	1.695	1.748	1.344	1.7	1.358	1.467	1.384	1.274
	2	1.589	1.444	1.401	1.312	1.484	1.339	1.374	1.448	1.378	1.288	1.194	1.444	1.429	1.464	1.398	1.378	1.21	1.351	1.3	1.473	1.313	1.321	1.625	1.633	1.528	1.671	1.637	1.54	1.667	1.46	1.57	1.469	1.608	1.658	1.553	1.405	1.59	1.735	1.586	1.66	1.774	1.502	1.616	1.686	1.651	1.507	1.524	1.665
	3	1.472	1.421	1.257	1.538	1.37	1.394	1.804	1.495	1.651	1.566	1.374	1.39	1.464	1.409	1.308	1.573	1.444	1.581	1.418	1.448	1.873	1.502	1.831	1.663	1.814	1.561	1.679	1.587	1.684	1.54	1.452	1.557	1.646	1.684	1.616	2.071	1.735	1.993	1.923	2.011	2.2	1.976	1.594	1.971	1.708	2.007	2.27	2.086
	Day	Mock-KO GDNF+Selp
	0	1.019	1.101	1.066	0.925	0.976	1.05	0.952	1.026	0.972	1.089	0.933	0.937	1.015	1.026	0.913	0.968	1.003	1.03	0.975	0.963	1.03	1.043	0.963	1.005	0.959	1.047	1.022	0.975	1.039	1.005	1.034	1.043	0.954	0.984	1.001	0.959	0.989	1.02	1.016	0.989	0.998	0.994	0.945	0.976	1.002	0.989	0.985	1.042
	1	0.941	0.917	0.925	0.972	0.788	0.898	0.987	1.073	0.894	1.042	0.987	0.991	0.804	0.894	0.987	0.929	0.866	0.901	1.182	1.152	0.912	1.174	0.975	0.95	0.971	1.384	0.975	1.106	0.971	0.933	1.089	1.178	1.026	1.098	1.039	1.043	1.095	1.371	1.016	1.099	1.13	1.41	1.099	1.375	1.055	1.173	1.353	1.287
	2	0.948	0.878	0.933	0.944	0.831	0.995	1.085	1.03	0.941	0.956	1.007	0.96	0.933	0.991	0.976	0.98	0.929	1.05	0.933	1.136	1.186	1.287	1.039	1.089	1.034	1.19	1.115	1.355	1.174	1.06	1.06	1.005	1.169	1.148	1.03	0.937	1.02	1.016	1.016	1.038	0.818	0.902	1.051	0.924	0.976	1.217	0.84	0.853
	3	1.003	0.909	1.222	0.917	1.077	1.058	1.116	0.862	1.175	0.933	1.015	1.073	0.956	0.905	1.109	1.019	0.987	1.062	0.963	0.942	0.975	0.9	0.866	1.106	0.996	0.954	0.959	0.895	0.878	1.186	1.013	0.862	0.807	0.79	1.14	0.937	1.068	0.967	1.112	0.998	1.134	0.985	1.002	0.972	1.09	1.195	1.081	1.024
	Day	TMEM127-KO GDNF
	0	0.965	0.952	1.032	0.943	1.041	1.045	1.045	0.992	0.996	1.032	1.041	0.974	0.996	0.956	0.974	1.036	1.05	0.93	0.952	0.997	0.988	1.039	1.048	1.089	0.97	1.061	0.975	0.938	1.057	1.043	1.025	0.943	0.97	1.002	0.938	0.965	1.054	0.998	1.074	1.064	0.953	0.958	1.008	1.003	1.008	1.029	1.019	0.943
	1	1.807	1.762	1.922	1.985	1.82	2.136	2.016	1.722	1.775	1.78	2.034	2.176	1.722	1.682	1.735	1.985	1.78	1.784	1.582	1.76	1.45	1.605	1.463	1.514	1.765	1.619	1.399	1.824	1.559	1.495	1.756	1.733	1.377	1.719	1.427	1.527	1.514	1.877	1.817	1.706	1.852	1.882	1.635	2.14	1.802	2.16	1.882	1.721
	2	2.555	2.791	2.595	2.893	2.461	2.773	2.639	2.701	2.817	2.995	2.688	2.684	2.425	2.986	2.67	3.116	2.626	2.857	1.966	2.162	1.952	2.094	2.002	2.139	2.244	2.272	2.299	2.048	1.979	2.089	2.304	2.03	2.304	2.226	2.021	2.08	2.14	2.059	2.135	2.388	2.221	2.09	1.968	2.504	2.226	2.256	2.681	2.216
	3	2.862	3.222	2.782	3.405	3.725	3.084	3.681	3.525	2.88	3.227	3.596	3.93	3.12	3.961	3.044	3.071	3.445	3.262	2.724	2.998	2.623	2.87	2.774	2.432	2.674	3.217	2.783	2.902	2.811	2.496	2.491	2.665	2.897	3.121	2.555	2.788	2.696	3.363	2.676	2.807	2.842	2.635	2.953	3.11	2.766	2.564	2.756	2.383
	Day	TMEM127-KO GDNF+Selp
	0	0.965	0.952	1.032	0.943	1.041	1.045	1.045	0.992	0.996	1.032	1.041	0.974	0.996	0.956	0.974	1.036	1.05	0.93	0.952	0.997	0.988	1.039	1.048	1.089	0.97	1.061	0.975	0.938	1.057	1.043	1.025	0.943	0.97	1.002	0.938	0.965	1.054	0.998	1.074	1.064	0.953	0.958	1.008	1.003	1.008	1.029	1.019	0.943
	1	1.232	1.045	1.023	1.068	1.081	1.134	1.085	1.023	0.974	1.143	1.019	1.272	0.952	1.059	0.996	1.072	0.912	1.303	0.97	0.897	0.787	0.819	0.979	0.906	1.002	1.02	0.865	0.86	1.029	0.988	0.979	0.92	0.874	0.92	1.02	1.016	0.726	0.832	0.938	1.125	0.938	0.746	0.756	0.938	0.938	1.034	0.852	0.796
	2	1.068	0.961	1.054	0.965	0.912	0.898	1.01	1.072	1.027	1.112	0.987	0.987	0.956	1.032	0.938	0.97	0.907	0.872	0.879	0.801	0.746	0.979	0.874	0.691	0.906	0.796	0.774	0.975	0.888	0.81	0.76	0.851	0.828	0.874	0.856	0.696	0.771	0.756	0.574	0.736	0.614	0.65	0.579	0.741	0.599	0.67	0.609	0.705
	3	1.09	0.876	0.978	1.023	1.032	0.84	0.978	1.143	0.907	1.032	1.01	1.032	1.019	1.045	0.805	1.045	0.867	0.912	0.71	0.682	0.737	0.76	0.669	0.65	0.787	0.701	0.796	0.765	0.796	0.719	0.691	0.819	0.664	0.806	0.719	0.765	0.554	0.685	0.655	0.695	0.655	0.68	0.72	0.801	0.685	0.771	0.68	0.726
[truncated: 6 more columns]
