# Supplementary material for: Loss of tumor suppressor TMEM127 drives RET-mediated transformation through disrupted membrane dynamics
Source: eLife journal article supplement (doi:10.7554/elife.89100), 2023-09-19
Supplement: fig8-figsupp3-data1 [file Figure 8 Supplement 3-Source Data 1.xlsx]

## Sheet: Fig 8 Supp 3
	Day	Mock-KO GDNF
	0	1.019	1.101	1.066	0.925	0.976	1.05	0.952	1.026	0.972	1.089	0.933	0.937	1.015	1.026	0.913	0.968	1.003	1.03	0.975	0.963	1.03	1.043	0.963	1.005	0.959	1.047	1.022	0.975	1.039	1.005	1.034	1.043	0.954	0.984	1.001	0.959	0.989	1.02	1.016	0.989	0.998	0.994	0.945	0.976	1.002	0.989	0.985	1.042
	1	1.273	1.347	1.058	1.183	1.183	1.3	1.511	1.612	1.323	1.374	1.401	1.327	1.273	1.343	1.3	1.237	1.417	1.413	1.241	1.308	1.334	1.287	1.338	1.283	1.372	1.443	1.245	1.33	1.169	1.393	1.144	1.355	1.262	1.292	1.292	1.144	1.27	1.704	1.384	1.371	1.695	1.748	1.344	1.7	1.358	1.467	1.384	1.274
	2	1.589	1.444	1.401	1.312	1.484	1.339	1.374	1.448	1.378	1.288	1.194	1.444	1.429	1.464	1.398	1.378	1.21	1.351	1.3	1.473	1.313	1.321	1.625	1.633	1.528	1.671	1.637	1.54	1.667	1.46	1.57	1.469	1.608	1.658	1.553	1.405	1.59	1.735	1.586	1.66	1.774	1.502	1.616	1.686	1.651	1.507	1.524	1.665
	3	1.472	1.421	1.257	1.538	1.37	1.394	1.804	1.495	1.651	1.566	1.374	1.39	1.464	1.409	1.308	1.573	1.444	1.581	1.418	1.448	1.873	1.502	1.831	1.663	1.814	1.561	1.679	1.587	1.684	1.54	1.452	1.557	1.646	1.684	1.616	2.071	1.735	1.993	1.923	2.011	2.2	1.976	1.594	1.971	1.708	2.007	2.27	2.086
	Day	Mock-KO GDNF+DMSO
	0	1.019	1.101	1.066	0.925	0.976	1.05	0.952	1.026	0.972	1.089	0.933	0.937	1.015	1.026	0.913	0.968	1.003	1.03	0.975	0.963	1.03	1.043	0.963	1.005	0.959	1.047	1.022	0.975	1.039	1.005	1.034	1.043	0.954	0.984	1.001	0.959	0.989	1.02	1.016	0.989	0.998	0.994	0.945	0.976	1.002	0.989	0.985	1.042
	1	1.081	0.98	1.023	1.003	0.862	0.937	0.952	0.956	0.87	1.081	0.921	0.921	0.944	0.995	1.058	0.909	0.933	0.991	1.237	1.587	1.448	1.523	1.414	1.254	1.38	1.519	1.279	1.38	1.338	1.233	1.233	1.574	1.27	1.346	1.275	1.249	1.274	1.805	1.423	1.388	1.586	1.634	1.27	1.743	1.358	1.467	1.375	1.476
	2	1.433	1.175	1.202	1.253	1.062	1.214	0.995	1.452	1.179	1.175	1.054	1.159	1.112	1.167	1.222	1.222	1.054	1.288	1.376	1.663	1.751	1.557	1.494	1.502	1.279	1.62	1.654	1.81	1.515	1.582	1.131	1.608	1.431	1.279	1.426	1.456	1.616	1.542	1.572	1.485	1.296	1.384	1.371	1.34	1.23	1.309	1.169	1.362
	3	1.335	1.234	1.23	1.534	1.648	1.468	1.319	1.116	1.23	1.714	1.366	1.437	1.472	1.359	1.194	1.624	1.206	1.417	1.692	1.393	1.768	1.511	1.384	1.477	1.355	1.178	1.435	1.363	1.595	1.494	1.249	1.157	1.376	1.296	1.431	1.654	1.52	2.042	1.98	1.752	1.695	1.59	1.349	2.287	1.739	1.849	2.213	2.16
	Day	Mock-KO GDNF+Selp
	0	1.019	1.101	1.066	0.925	0.976	1.05	0.952	1.026	0.972	1.089	0.933	0.937	1.015	1.026	0.913	0.968	1.003	1.03	0.975	0.963	1.03	1.043	0.963	1.005	0.959	1.047	1.022	0.975	1.039	1.005	1.034	1.043	0.954	0.984	1.001	0.959	0.989	1.02	1.016	0.989	0.998	0.994	0.945	0.976	1.002	0.989	0.985	1.042
	1	0.941	0.917	0.925	0.972	0.788	0.898	0.987	1.073	0.894	1.042	0.987	0.991	0.804	0.894	0.987	0.929	0.866	0.901	1.182	1.152	0.912	1.174	0.975	0.95	0.971	1.384	0.975	1.106	0.971	0.933	1.089	1.178	1.026	1.098	1.039	1.043	1.095	1.371	1.016	1.099	1.13	1.41	1.099	1.375	1.055	1.173	1.353	1.287
	2	0.948	0.878	0.933	0.944	0.831	0.995	1.085	1.03	0.941	0.956	1.007	0.96	0.933	0.991	0.976	0.98	0.929	1.05	0.933	1.136	1.186	1.287	1.039	1.089	1.034	1.19	1.115	1.355	1.174	1.06	1.06	1.005	1.169	1.148	1.03	0.937	1.02	1.016	1.016	1.038	0.818	0.902	1.051	0.924	0.976	1.217	0.84	0.853
	3	1.003	0.909	1.222	0.917	1.077	1.058	1.116	0.862	1.175	0.933	1.015	1.073	0.956	0.905	1.109	1.019	0.987	1.062	0.963	0.942	0.975	0.9	0.866	1.106	0.996	0.954	0.959	0.895	0.878	1.186	1.013	0.862	0.807	0.79	1.14	0.937	1.068	0.967	1.112	0.998	1.134	0.985	1.002	0.972	1.09	1.195	1.081	1.024
	Day	TMEM127-KO GDNF
	0	0.965	0.952	1.032	0.943	1.041	1.045	1.045	0.992	0.996	1.032	1.041	0.974	0.996	0.956	0.974	1.036	1.05	0.93	0.952	0.997	0.988	1.039	1.048	1.089	0.97	1.061	0.975	0.938	1.057	1.043	1.025	0.943	0.97	1.002	0.938	0.965	1.054	0.998	1.074	1.064	0.953	0.958	1.008	1.003	1.008	1.029	1.019	0.943
	1	1.807	1.762	1.922	1.985	1.82	2.136	2.016	1.722	1.775	1.78	2.034	2.176	1.722	1.682	1.735	1.985	1.78	1.784	1.582	1.76	1.45	1.605	1.463	1.514	1.765	1.619	1.399	1.824	1.559	1.495	1.756	1.733	1.377	1.719	1.427	1.527	1.514	1.877	1.817	1.706	1.852	1.882	1.635	2.14	1.802	2.16	1.882	1.721
	2	2.555	2.791	2.595	2.893	2.461	2.773	2.639	2.701	2.817	2.995	2.688	2.684	2.425	2.986	2.67	3.116	2.626	2.857	1.966	2.162	1.952	2.094	2.002	2.139	2.244	2.272	2.299	2.048	1.979	2.089	2.304	2.03	2.304	2.226	2.021	2.08	2.14	2.059	2.135	2.388	2.221	2.09	1.968	2.504	2.226	2.256	2.681	2.216
	3	2.862	3.222	2.782	3.405	3.725	3.084	3.681	3.525	2.88	3.227	3.596	3.93	3.12	3.961	3.044	3.071	3.445	3.262	2.724	2.998	2.623	2.87	2.774	2.432	2.674	3.217	2.783	2.902	2.811	2.496	2.491	2.665	2.897	3.121	2.555	2.788	2.696	3.363	2.676	2.807	2.842	2.635	2.953	3.11	2.766	2.564	2.756	2.383
	Day	TMEM127-KO GDNF+DMSO
	0	0.965	0.952	1.032	0.943	1.041	1.045	1.045	0.992	0.996	1.032	1.041	0.974	0.996	0.956	0.974	1.036	1.05	0.93	0.952	0.997	0.988	1.039	1.048	1.089	0.97	1.061	0.975	0.938	1.057	1.043	1.025	0.943	0.97	1.002	0.938	0.965	1.054	0.998	1.074	1.064	0.953	0.958	1.008	1.003	1.008	1.029	1.019	0.943
	1	1.709	1.691	1.771	1.682	1.971	2.265	1.731	1.927	2.296	2.029	1.9	2.354	1.789	1.709	1.74	1.7	1.815	1.704	1.578	1.683	1.413	1.491	1.454	1.541	1.719	1.591	1.436	1.326	1.491	1.504	1.742	1.683	1.436	1.399	1.495	1.514	1.564	1.797	1.898	1.857	1.771	1.64	1.721	1.731	1.913	2.13	1.741	1.923
	2	2.189	3.227	2.612	2.67	2.599	2.666	2.452	2.768	2.55	3.213	2.528	2.644	2.394	2.287	2.345	2.639	2.822	2.902	1.952	2.18	2.217	2.139	2.011	2.039	2.185	2.176	2.144	2.158	2.062	1.897	1.916	2.116	1.806	2.244	2.03	1.961	2.388	2.347	2.413	2.6	2.201	2.423	2.201	2.241	2.201	2.276	2.16	1.968
	3	2.902	2.88	2.977	2.857	3.481	2.924	3.044	2.986	2.755	2.862	3.392	3.467	2.835	2.652	2.403	2.684	3.374	2.715	2.71	2.427	2.642	2.674	2.235	2.432	2.007	2.697	2.304	2.687	2.61	2.614	1.984	2.24	2.112	2.665	2.491	2.441	2.544	2.908	2.681	2.63	2.711	2.64	2.524	2.696	2.625	2.721	2.367	2.585
	Day	TMEM127-KO GDNF+Selp
	0	0.965	0.952	1.032	0.943	1.041	1.045	1.045	0.992	0.996	1.032	1.041	0.974	0.996	0.956	0.974	1.036	1.05	0.93	0.952	0.997	0.988	1.039	1.048	1.089	0.97	1.061	0.975	0.938	1.057	1.043	1.025	0.943	0.97	1.002	0.938	0.965	1.054	0.998	1.074	1.064	0.953	0.958	1.008	1.003	1.008	1.029	1.019	0.943
	1	1.232	1.045	1.023	1.068	1.081	1.134	1.085	1.023	0.974	1.143	1.019	1.272	0.952	1.059	0.996	1.072	0.912	1.303	0.97	0.897	0.787	0.819	0.979	0.906	1.002	1.02	0.865	0.86	1.029	0.988	0.979	0.92	0.874	0.92	1.02	1.016	0.726	0.832	0.938	1.125	0.938	0.746	0.756	0.938	0.938	1.034	0.852	0.796
	2	1.068	0.961	1.054	0.965	0.912	0.898	1.01	1.072	1.027	1.112	0.987	0.987	0.956	1.032	0.938	0.97	0.907	0.872	0.879	0.801	0.746	0.979	0.874	0.691	0.906	0.796	0.774	0.975	0.888	0.81	0.76	0.851	0.828	0.874	0.856	0.696	0.771	0.756	0.574	0.736	0.614	0.65	0.579	0.741	0.599	0.67	0.609	0.705
	3	1.09	0.876	0.978	1.023	1.032	0.84	0.978	1.143	0.907	1.032	1.01	1.032	1.019	1.045	0.805	1.045	0.867	0.912	0.71	0.682	0.737	0.76	0.669	0.65	0.787	0.701	0.796	0.765	0.796	0.719	0.691	0.819	0.664	0.806	0.719	0.765	0.554	0.685	0.655	0.695	0.655	0.68	0.72	0.801	0.685	0.771	0.68	0.726
[truncated: 6 more columns]
